# Supplementary material for: The Enhanced Recovery after Surgery (ERAS) Pathway Is a Safe Journey for Kidney Transplant Recipients during the “Extended Criteria Donor” Era
Source: MDPI journal article supplement (doi:10.3390/pathogens11101193), 2022-10-16
Supplement: s1 [file s1]

Table S1: causes of re-admission.

| Causes of re-admission         | Early re-admission<br>(<3 months after KT) | Late re-admission<br>(4-12 months after<br>KT) |
|--------------------------------|--------------------------------------------|------------------------------------------------|
| Infections                     | 49 (10.8%)                                 | 14 (3.1%)                                      |
| ARF and electrolyte imbalances | 23 (5.1%)                                  | 5 (1.1%)                                       |
| Surgical complications         | 11 (2.4%)                                  | 1 (0.2%)                                       |
| Cardiovascular complications   | 15 (3.3%)                                  | 3 (0.7%)                                       |
| Cancer                         | 1 (0.2%)                                   | 1 (0.2%)                                       |
| Urological complications       | 12 (2.6%)                                  | 3 (0.7%)                                       |
| Rejection                      | 1 (0.2%)                                   | 1 (0.2%)                                       |
| Other complications            | 10 (2.2%)                                  | 6 (1.3%)                                       |

Abbreviations: ARF = Acute Renal Failure.

Table S2: Univariate analysis of subgroup of KT recipients transplanted with extended criteria donor grafts.

| Variables                                                                                                         | Patients discharged<br>≤5 days after KT<br>(n= 89) | Patients discharged<br>>5 days after KT<br>(n=136) | p value |
|-------------------------------------------------------------------------------------------------------------------|----------------------------------------------------|----------------------------------------------------|---------|
| <b>Recipient</b>                                                                                                  |                                                    |                                                    |         |
| Age (years)                                                                                                       | 63 (36-77)                                         | 63 (29-74)                                         | 0.396   |
| Age > 60 years                                                                                                    | 62 (69.7%)                                         | 101 (74.3%)                                        | 0.451   |
| Gender (male)                                                                                                     | 58 (65.2%)                                         | 87 (64.4%)                                         | 0.887   |
| BMI                                                                                                               | 24 (17.7-32.6)                                     | 24.7 (16.8-33.3)                                   | 0.095   |
| Obesity (BMI ≥30)                                                                                                 | 7 (7.9%)                                           | 12 (8.8%)                                          | 1.000   |
| Cause of ESRD:                                                                                                    |                                                    |                                                    |         |
| • Glomerulonephritis                                                                                              | 41 (46.1%)                                         | 47 (34.6%)                                         | 0.144   |
| • ADPKD                                                                                                           | 23 (25.8%)                                         | 26 (19.1%)                                         |         |
| • Arterial hypertension                                                                                           | 6 (6.7%)                                           | 21 (15.4%)                                         |         |
| • Other causes<br>(unspecified, SLE,<br>vasculitis, HUS,<br>drug-induced<br>nephropathy,<br>cystinosis, oxalosis) | 4 (4.5%)                                           | 13 (9.6%)                                          |         |
| • Pyelonephritis                                                                                                  | 6 (6.7%)                                           | 9 (6.6%)                                           |         |
| • Unknown ESRD                                                                                                    | 6 (6.7%)                                           | 8 (5.9%)                                           |         |
| • Diabetes                                                                                                        | 3 (3.4%)                                           | 10 (7.4%)                                          |         |
| • Congenital malformation                                                                                         | 0 (0%)                                             | 2 (1.5%)                                           |         |

|                                    |                |               |        |
|------------------------------------|----------------|---------------|--------|
| Median time on waiting list (days) | 623 (1-3773)   | 629 (2-3185)  | 0.957  |
| Comorbidities                      |                |               |        |
| • Arterial hypertension            | 16 (18%)       | 50 (36.8%)    | 0.003  |
| • Cardiovascular diseases          | 12 (13.5%)     | 33 (24.3%)    | 0.061  |
| • DMII                             | 6 (6.8%)       | 14 (10.3%)    | 0.474  |
| • Comorbidities $\geq 2$           | 4 (4.5%)       | 14 (10.3%)    | 0.138  |
| <b>Donor</b>                       |                |               |        |
| Age (years)                        | 65 (48-88)     | 66 (51-83)    | 0.594  |
| Age > 60 years                     | 67 (75.3%)     | 111 (81.6%)   | 0.314  |
| Cause of death:                    |                |               |        |
| • Cerebral haemorrhage             | 71 (79.8%)     | 108 (79.4%)   |        |
| • Head trauma                      | 6 (6.7%)       | 14 (10.3%)    |        |
| • Ischemic stroke                  | 9 (10.1%)      | 9 (6.6%)      | 0.660  |
| • Anoxic encephalopathy            | 3 (3.4%)       | 5 (3.7%)      |        |
| • Others                           | 0 (0%)         | 0 (0%)        |        |
| Comorbidities:                     |                |               |        |
| • Cardiovascular disease           | 23 (25.8%)     | 40 (29.4%)    | 0.649  |
| • Arterial hypertension            | 63 (70.8%)     | 80 (58.8%)    | 0.089  |
| • $\geq 2$ comorbidities           | 35 (39.3%)     | 40 (29.4%)    | 0.148  |
| <b>Transplant</b>                  |                |               |        |
| Type of KT:                        |                |               |        |
| • Single KT                        | 85 (95.5%)     | 122 (89.7%)   |        |
| • Dual KT (unilateral/bilateral)   | 4 (4.5%)       | 14 (10.3%)    |        |
| Re-transplant                      | 8 (9%)         | 10 (7.4%)     | 0.802  |
| Sequential KT after LT             | 2 (2.2%)       | 1 (0.7%)      | 0.564  |
| Pre-implant renal biopsy:          |                |               |        |
| • Renal biopsy score $\leq 3$      | 33 (47.8%)     | 36 (52.2%)    |        |
| • Renal biopsy score $> 3$         | 66 (59.5%)     | 45 (40.5%)    | 0.165  |
| Median CIT (hours)                 | 605 (285-1400) | 732 (64-1380) | 0.026  |
| CIT $\geq 10$ h                    | 25 (28.1%)     | 62 (45.6%)    | 0.012  |
| <b>Outcomes</b>                    |                |               |        |
| Post-KT delayed graft function     | 19 (21.3%)     | 79 (58.1%)    | <0.001 |

|                                                              |            |            |        |
|--------------------------------------------------------------|------------|------------|--------|
| Median hospital stay (days)                                  | 5 (3-5)    | 7.5 (6-39) | <0.001 |
| Post-operative dialytic treatment:                           |            |            |        |
| • In-hospital                                                | 13 (14.6%) | 72 (58.1%) | <0.001 |
| • At peripheral centre                                       | 9 (10.1%)  | 15 (11%)   | 1.000  |
| Early complications ( $\leq 3$ months after KT)              |            |            |        |
| • Infectious                                                 | 20 (22.5%) | 41 (30.1%) | 0.223  |
| • Urological                                                 | 10 (11.2%) | 10 (7.4%)  | 0.345  |
| • Vascular                                                   | 1 (1.1%)   | 1 (0.4%)   | 0.396  |
| 1-year Re-admission rates after KT                           |            |            |        |
| • Early ( $\leq 3$ months after KT)                          | 37 (41.6%) | 54 (39.7%) | 0.783  |
| • Late (4-12 months after KT)                                | 47 (52.8%) | 63 (46.3%) | 0.413  |
| Median time of re-admission after KT (days)                  | 48 (1-305) | 43 (3-352) | 0.299  |
| Number of outpatient clinic reviews within 3 months after KT | 7 (0-19)   | 7 (0-15)   | 0.899  |

Abbreviations: ADPKD= autosomal dominant polycystic kidney disease; BMI= body mass index; CIT=Cold ischemia time; DMII= Diabetes Mellitus type II; ESRD= End-stage renal disease; HUS= hemolytic uremic syndrome; KT= Kidney Transplantation; SLE= systemic lupus erythematosus.

Table S3: Multivariate model evaluating predicting factors for late discharge after kidney transplantation in patients receiving ECD grafts.

| Variables                | HR            | 95%-CI     | p value |
|--------------------------|---------------|------------|---------|
| CIT $\geq 10$ h          | 1.83          | 0.966–3.45 | 0.064   |
| DGF                      | 1.62          | 0.63–4.20  | 0.320   |
| In-hospital treatment    | dialytic 4.78 | 1.69–13.47 | 0.003   |
| Recipient's hypertension | arterial 3.02 | 1.49–6.11  | 0.002   |

Abbreviations : CIT =Cold ischemia time ; DGF= delayed graft function
